# Supplementary material
Source: Springer Nature journal article supplement (https://www.springermedizin.de/resource/supplementary/12893_2009_139_MOESM3_ESM.pdf/9513028)

| Pre-Op Dx Classed |       |
|-------------------|-------|
| Benign            | 0.91  |
| Cancer            | 1.82  |
| Indeterminate     | 97.27 |

| Worst FNA     |       |
|---------------|-------|
| Inadequate    | 0.0   |
| Indeterminate | 100.0 |
| Negative      | 0.0   |
| Positive      | 0.0   |

| Max Nodule US Size |       |
|--------------------|-------|
| Up to 18           | 25.11 |
| 18 to 31           | 37.56 |
| 31 plus            | 37.33 |

| Overall Pathology Dx |       |
|----------------------|-------|
| Benign               | 35.01 |
| Cancer               | 64.99 |

| US Nature Overall |       |
|-------------------|-------|
| Complex Cyst      | 0.0   |
| Mixed             | 0.0   |
| Simple Cyst       | 0.0   |
| Solid             | 100.0 |

| Worst EIS         |       |
|-------------------|-------|
| 1-Definitely B... | 0.0   |
| 2-Probably B...   | 0.0   |
| 3-Susp for ca...  | 0.0   |
| 4-Probably C...   | 100.0 |
| 5-Definitely C... | 0.0   |

Nuc Med Overall

Age

Thyroid Status

Cervical lymph nodes

ETHNICITY

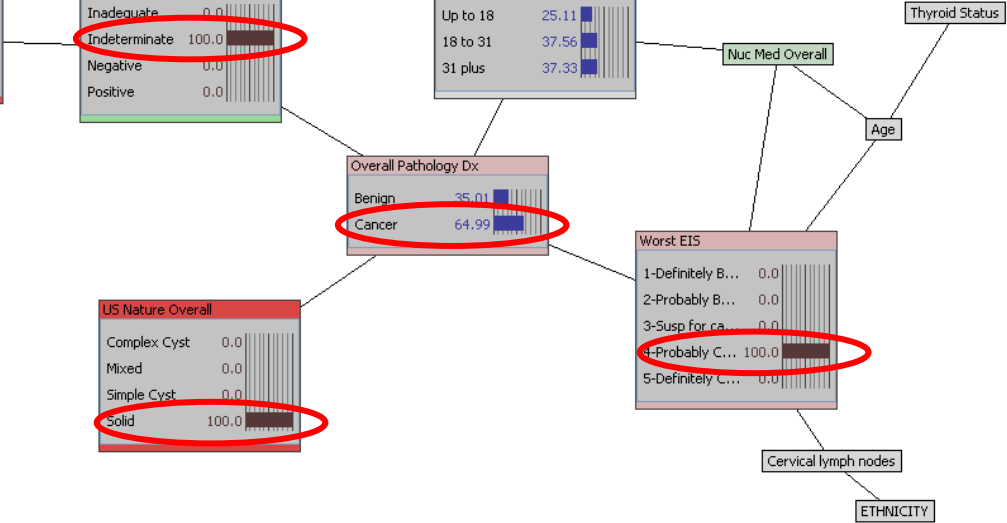

Supplement: MOESM3 [file 9513028]
